# Supplementary material
Source: PubMed Central journal article supplement (PMC1378125)

**Supplementary Table S2b. Bisulfite methylation profiles of CpG islands and CpG islets used in this study.**

Continuation of the table displaying the 126 CpG islands and CpG islets analysed. The “Notes” column includes repeat elements or 5’-gene associated with CpG island or CpG islet. The methylation pattern is expressed as two clusters. Methylation profile expressed as the percentage of methylated CpG dinucleotides to the total assayed. The upper cluster is the profile for N10 while the lower cluster is for M10. Each CpG dinucleotide is represented as a column while each clone sequenced is represented as a row. Methylated and unmethylated dinucleotides are expressed as red and yellow circles respectively. White circles represent sites at which the methylation status was undetermined.

| Island/<br>Islet<br>Number | CpG Report Length | Notes        | Difference<br>(M10-N10) | N10  | M10  | Bisulfite Methylation Pattern |
|----------------------------|-------------------|--------------|-------------------------|------|------|-------------------------------|
| 66                         | 109bp             | AluY         | 34                      | 58.9 | 92.9 |                               |
| 67                         | 69bp              | L1R22B/L1ME2 | 32.5                    | 62.5 | 90   |                               |

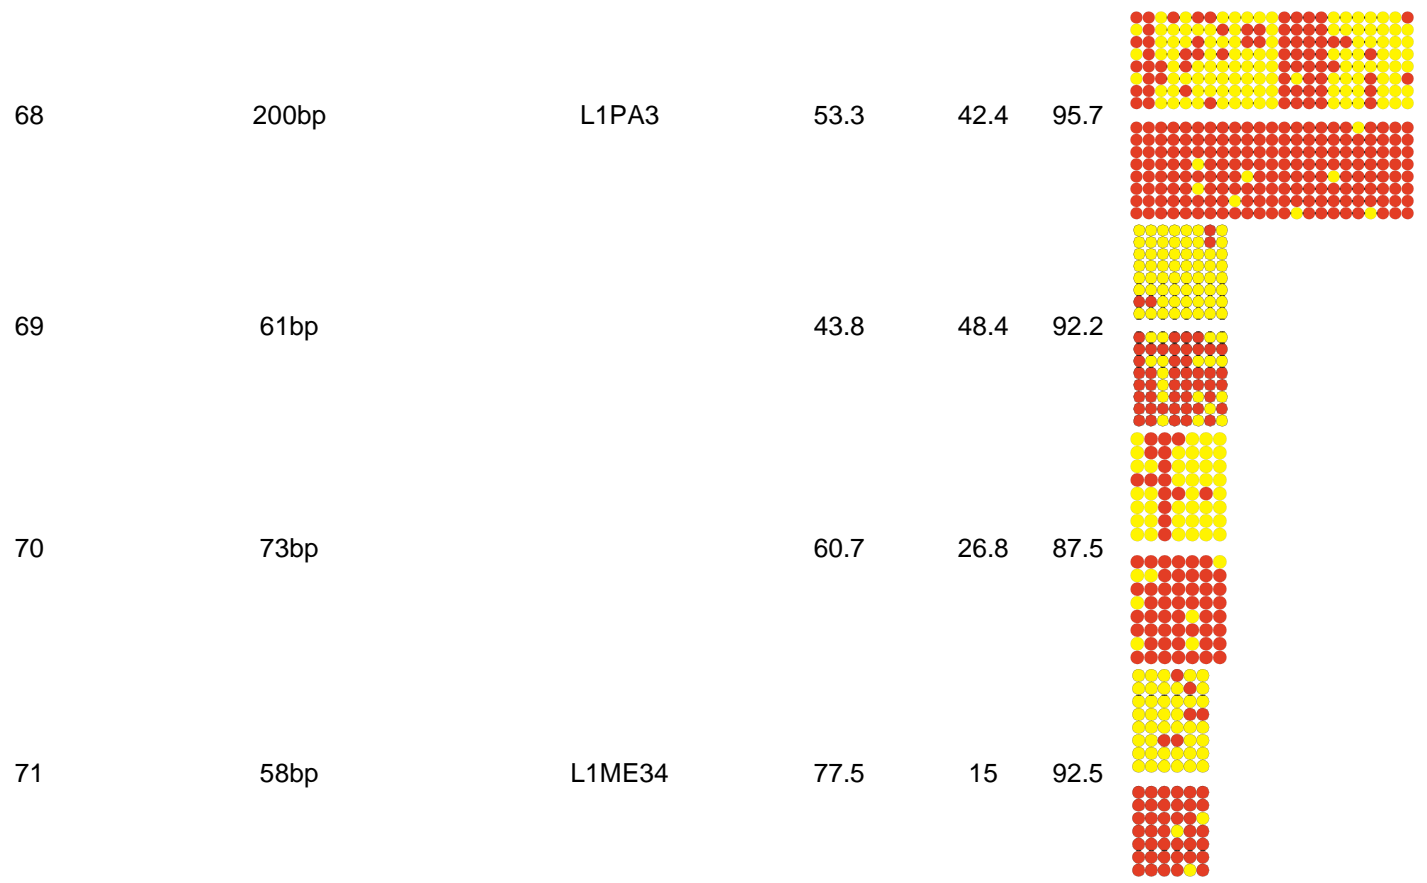

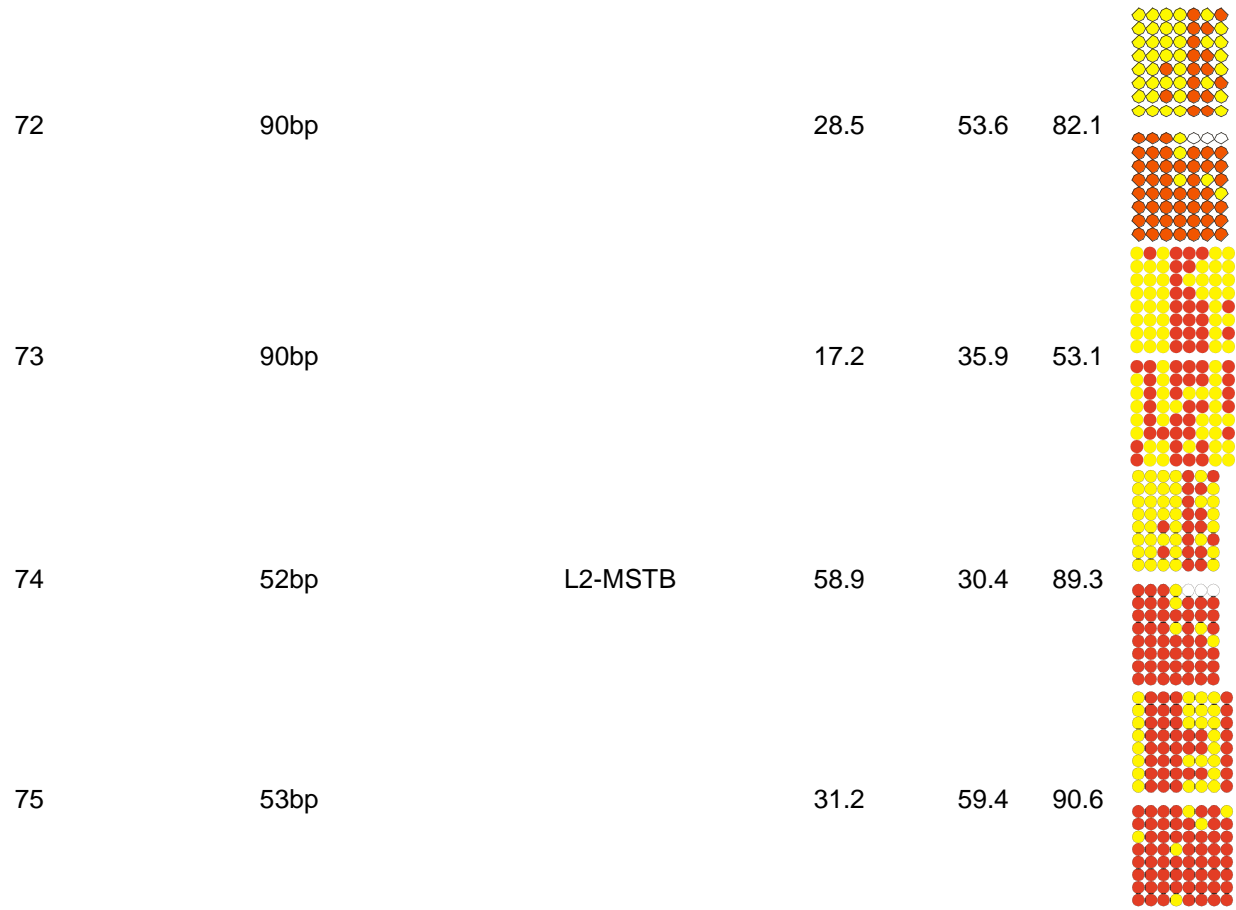

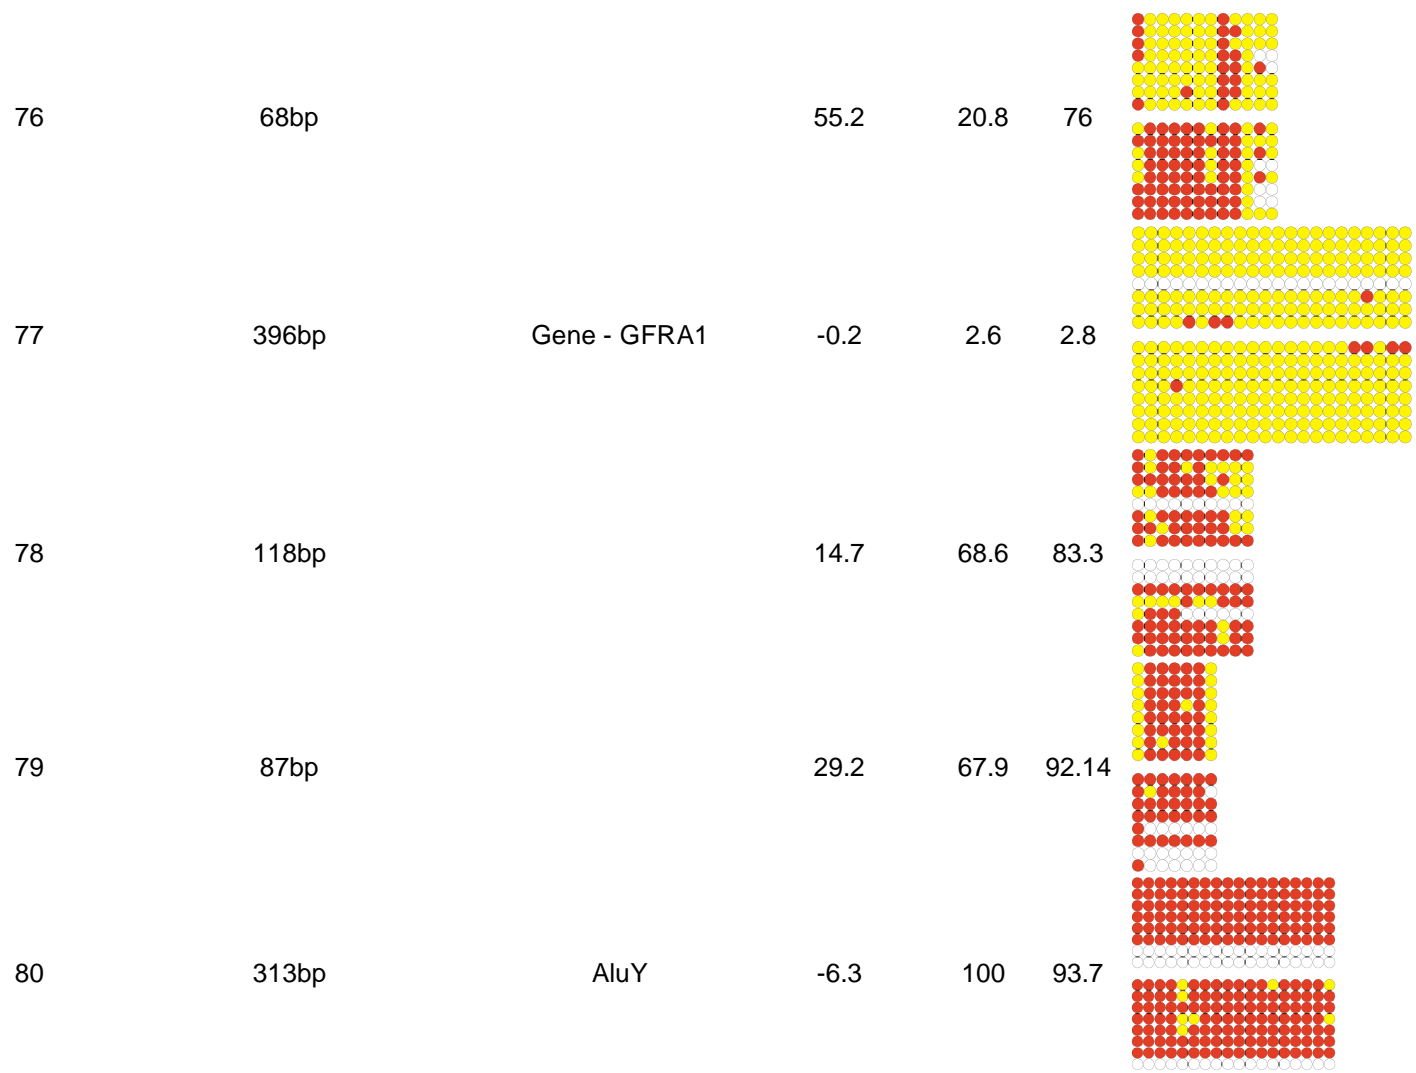

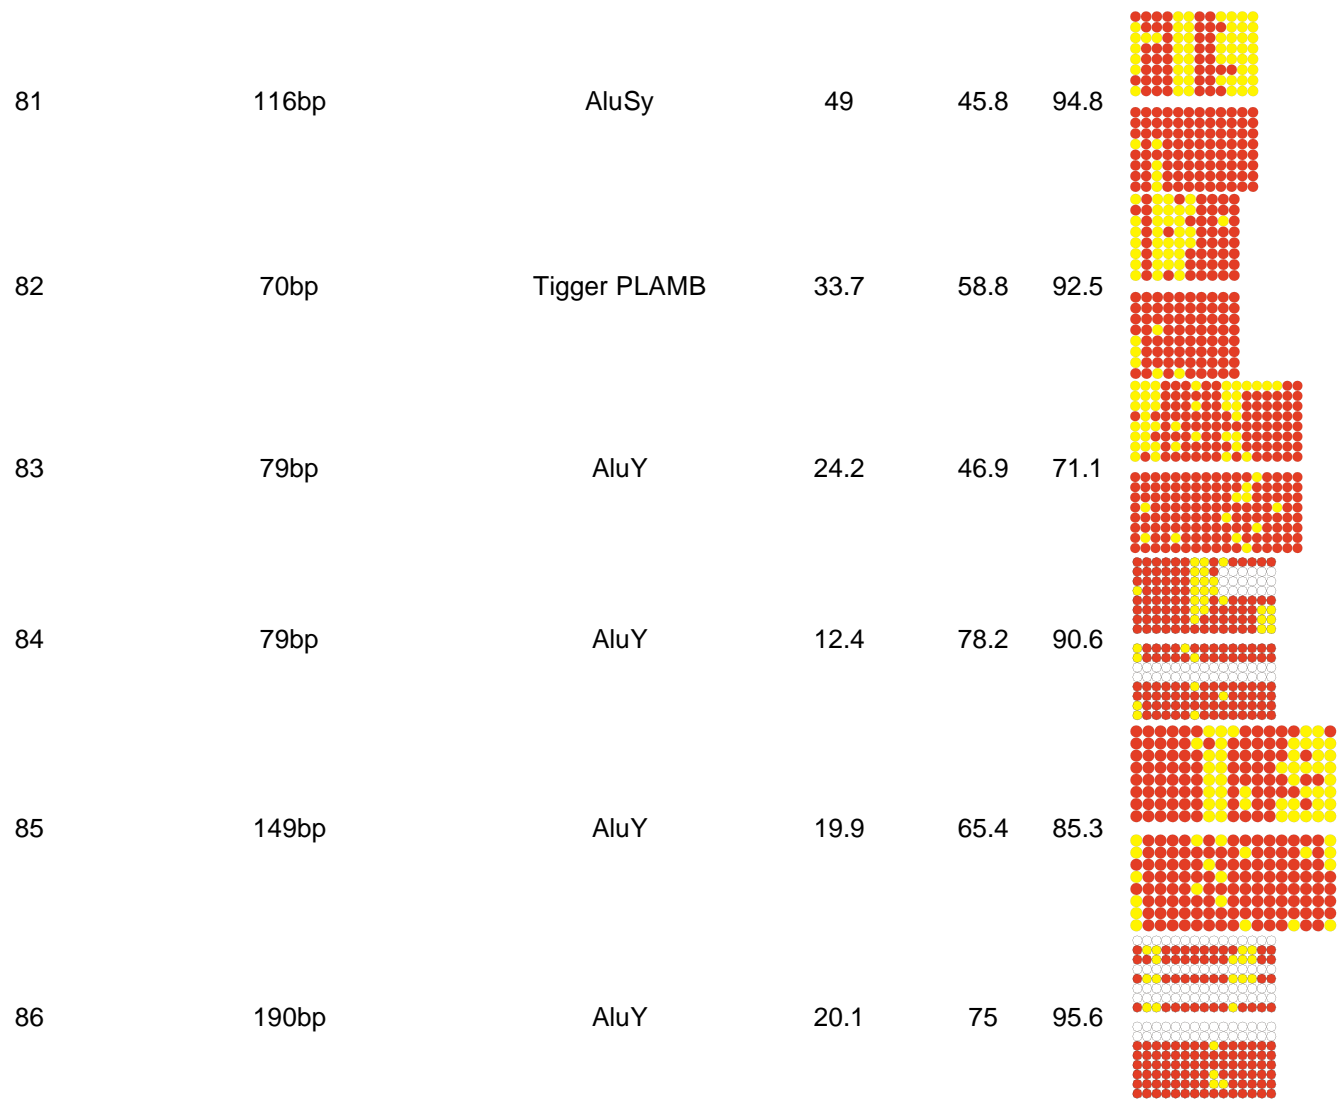

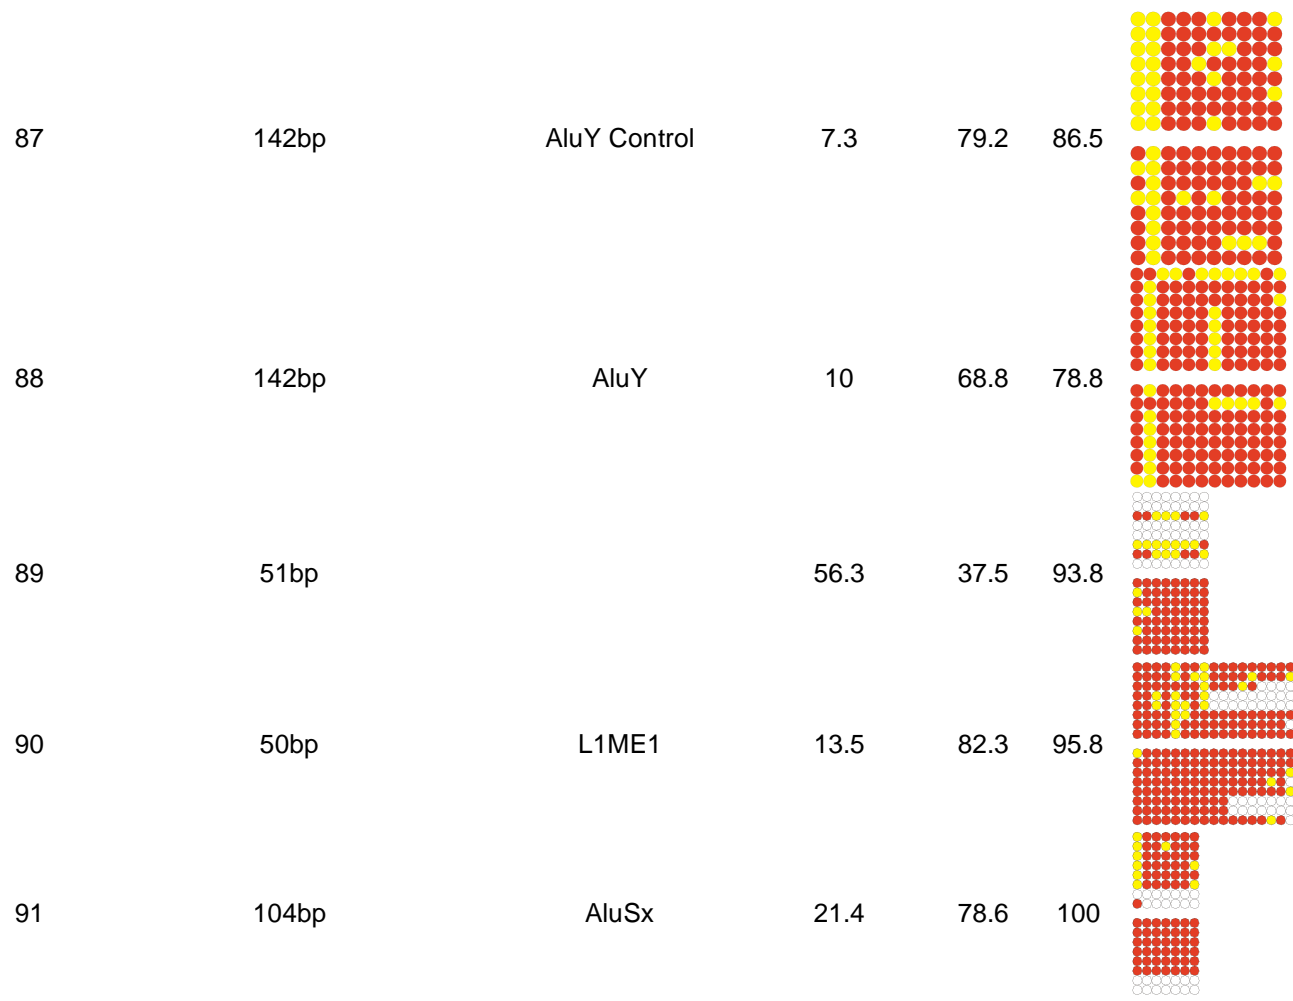

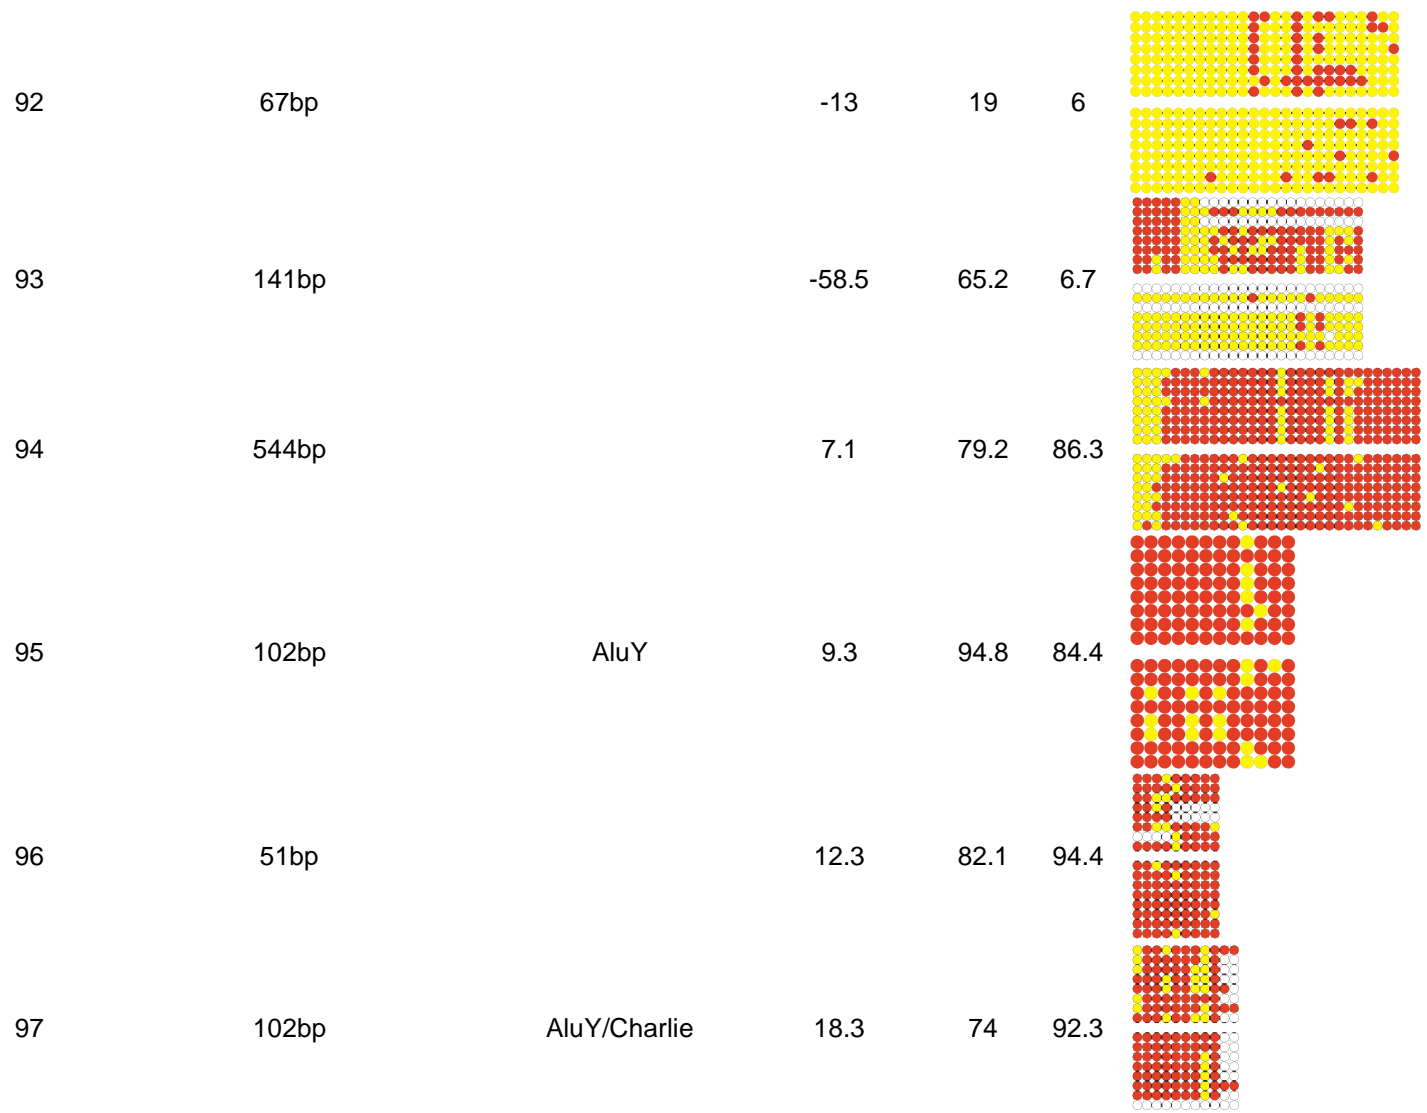

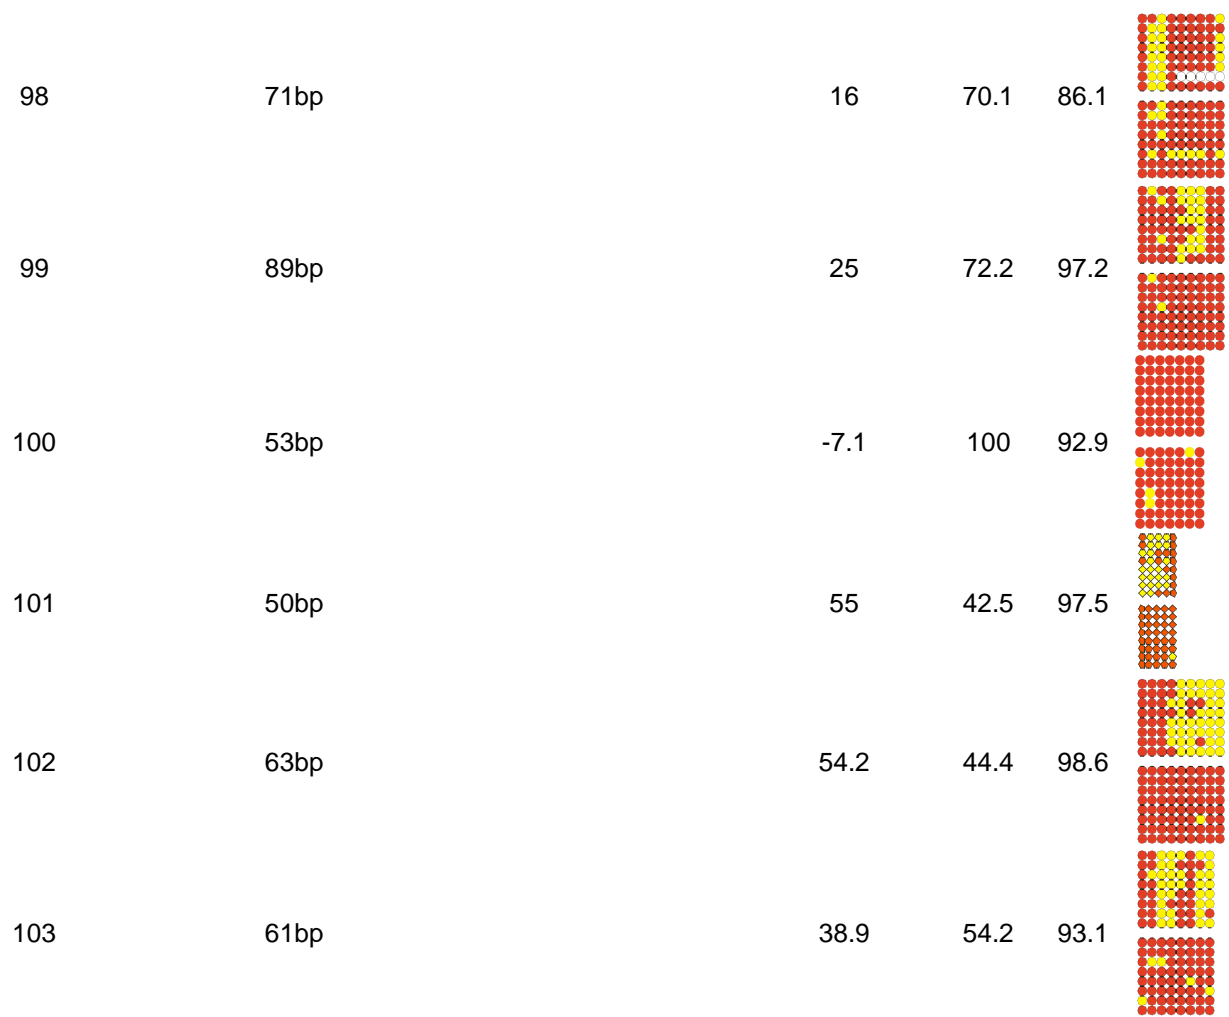



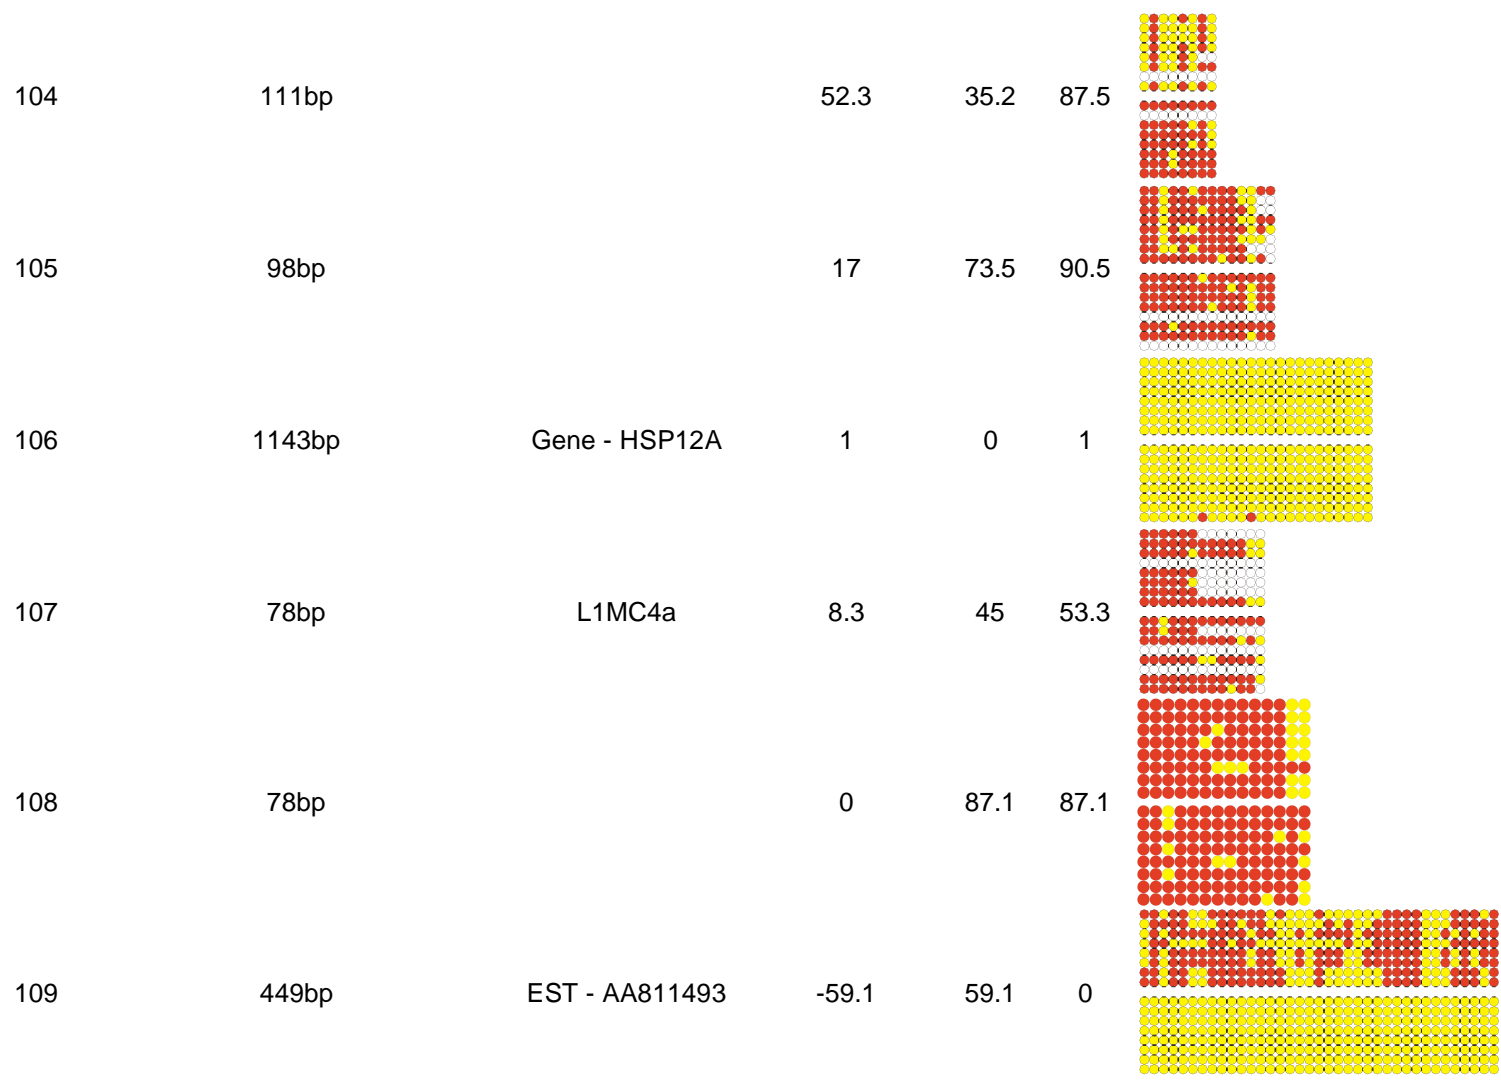

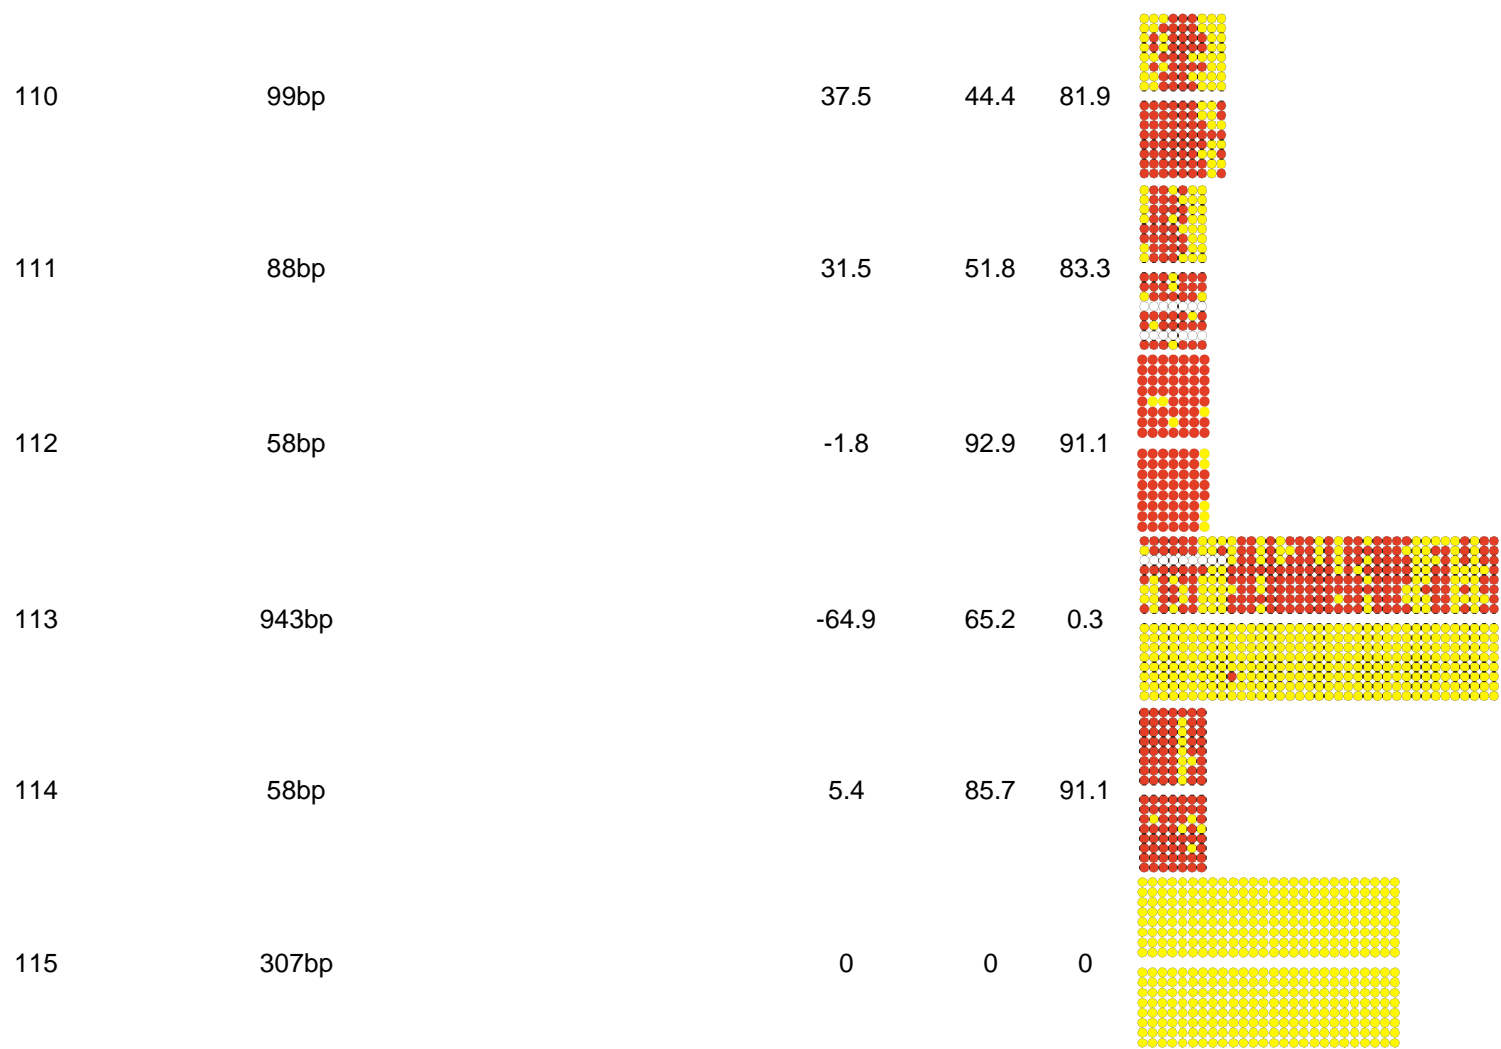

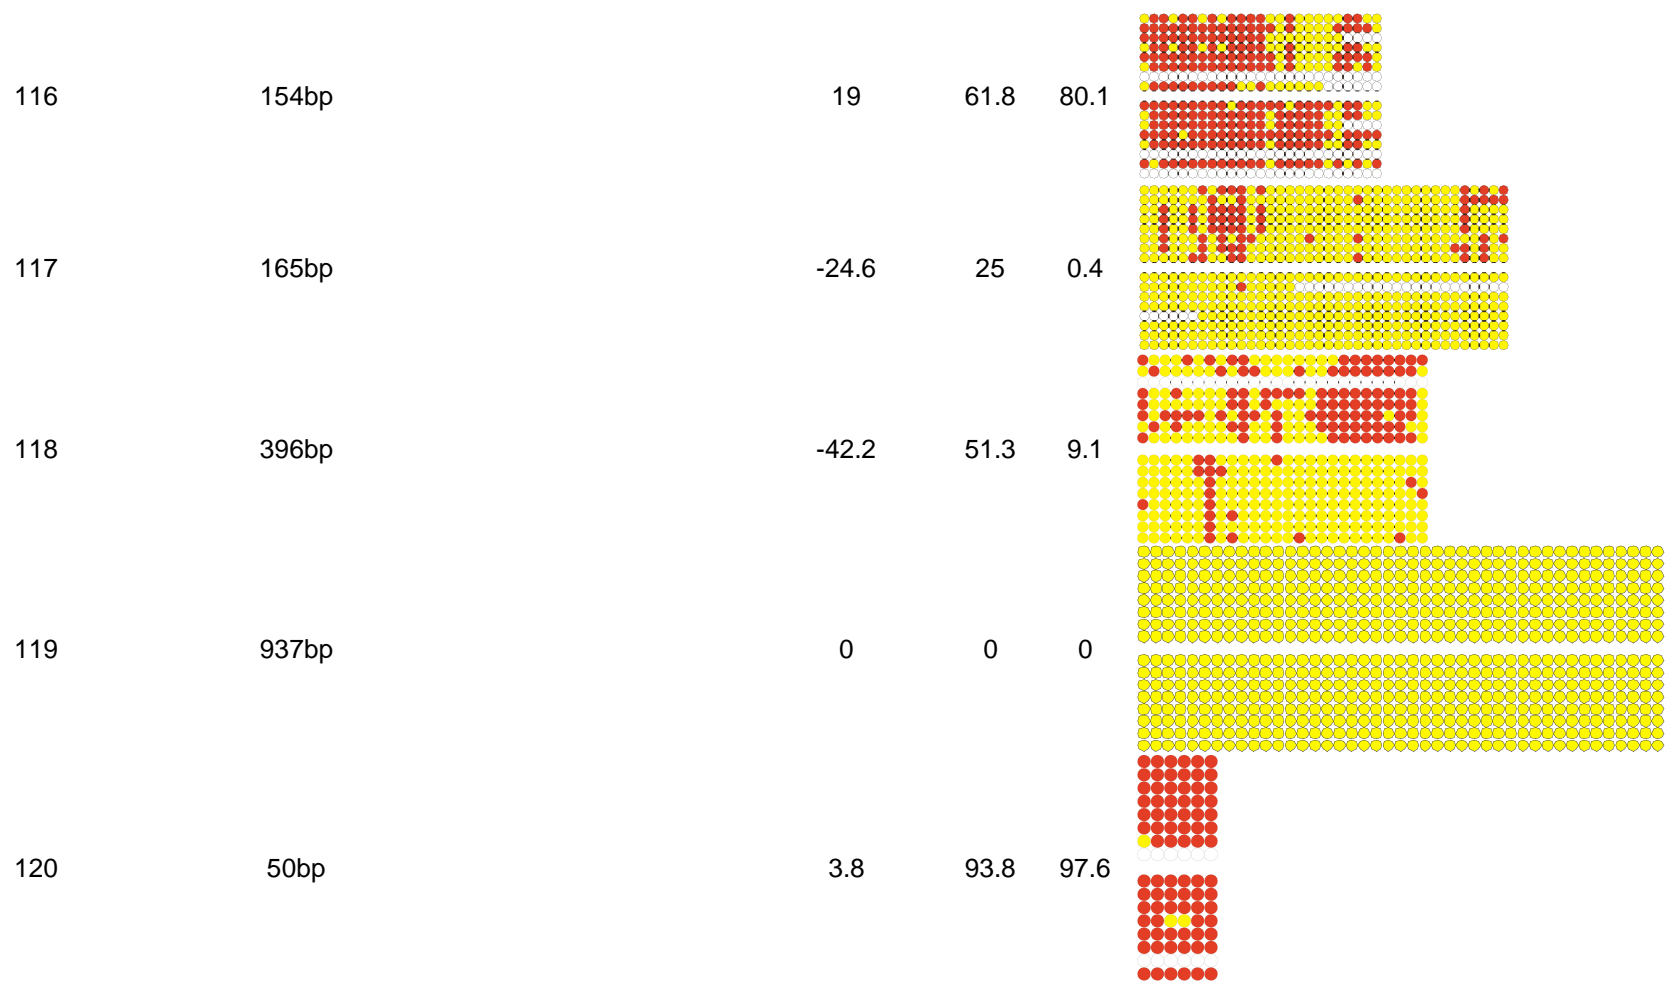

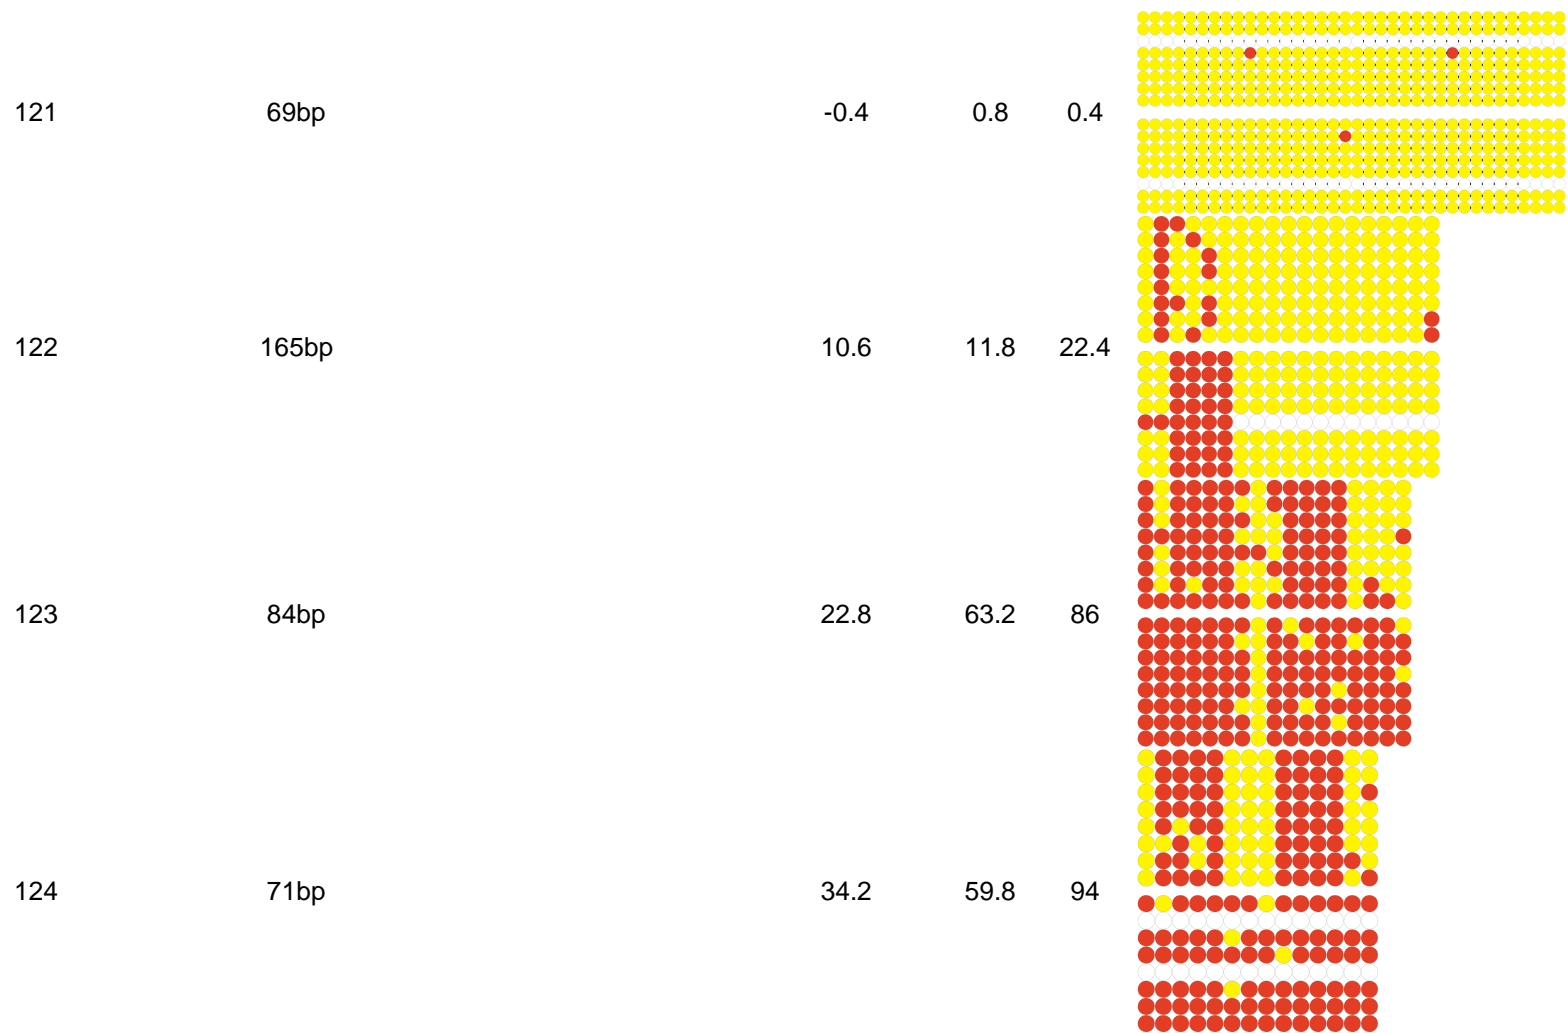

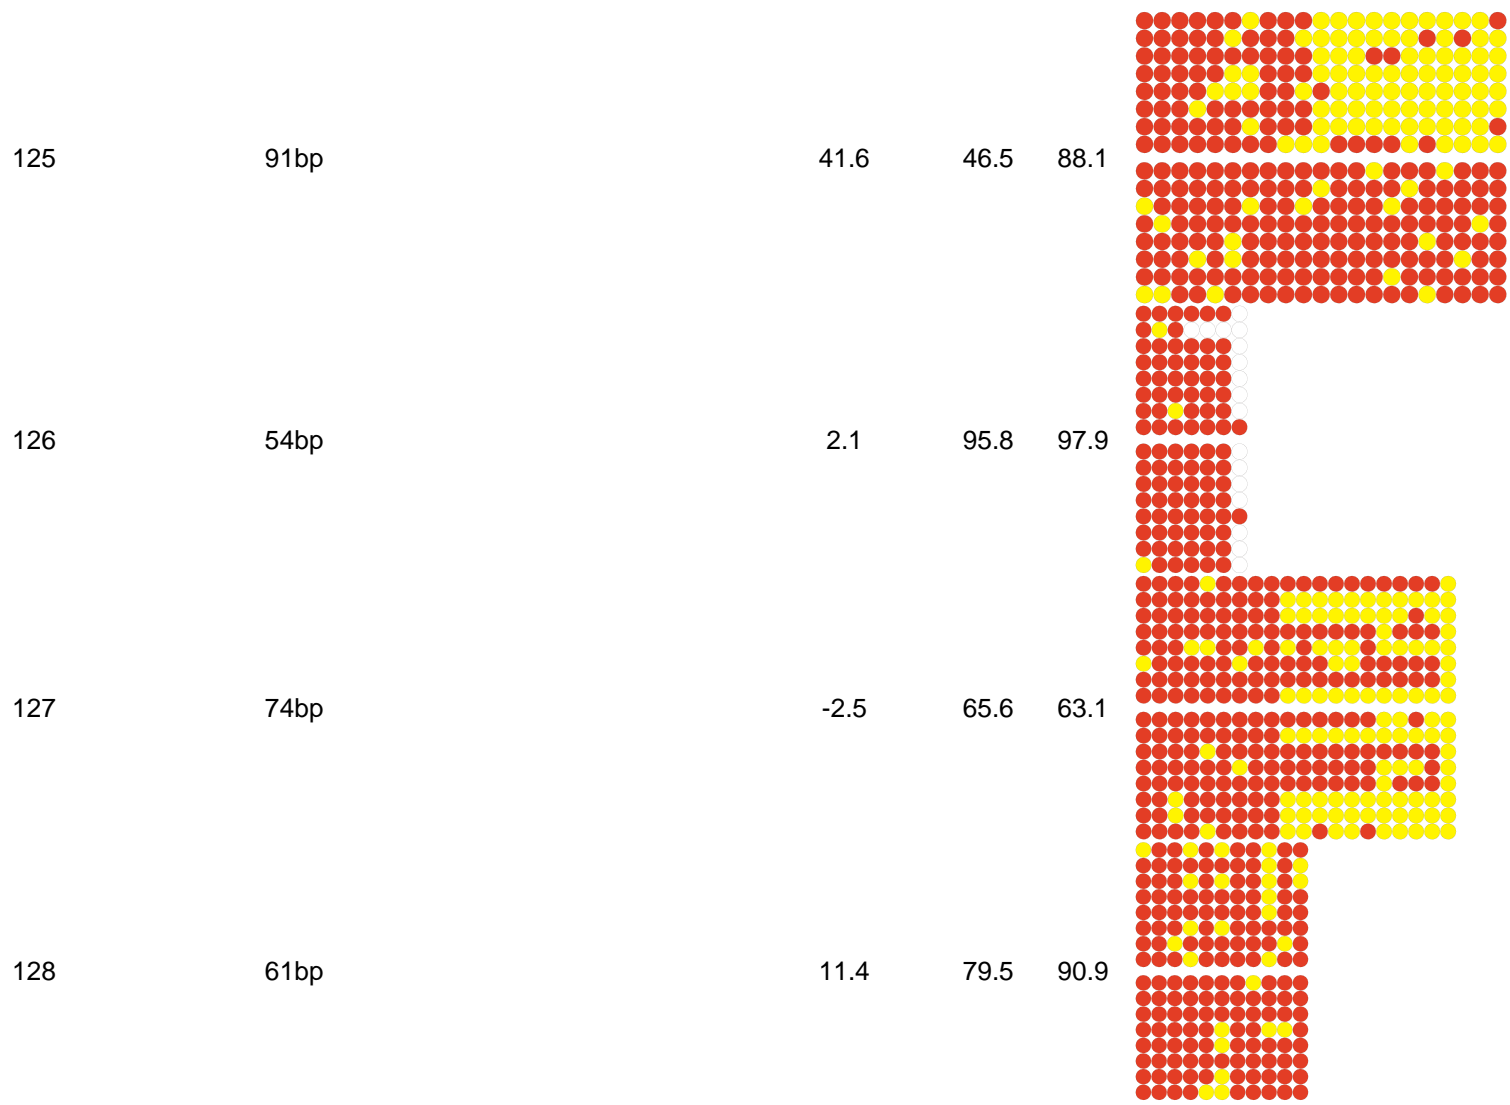

Supplement: pgen.0020017.st003.pdf [file pgen.0020017.st003.pdf]
